# Supplementary material for: The Role of Spatialisation and Spatial Planning in Improving Food Systems: Insights from the Fast-Growing City of Dhaka, Bangladesh
Source: MDPI journal article supplement (doi:10.3390/su15043423), 2023-02-13
Supplement: s1 [file s1]

Archive with 3 entries (3 files):
- Supplementary data S1 -Market data collection survey.pdf
- Supplementary data S2 - Interview questions.pdf
- Supplementary data S3 - Narratives.pdf
