# Supplementary material for: The Role of Spatialisation and Spatial Planning in Improving Food Systems: Insights from the Fast-Growing City of Dhaka, Bangladesh
Source: MDPI journal article supplement (doi:10.3390/su15043423), 2023-02-13
Supplement: s1 [file s1]

## **Supplementary data S2 - Interview questions**

A selection of the following questions was asked to the interviewees, targeted to their role and expertise.

1. How many fresh market are there in total in your city corporation (including state-owned, private, and real estate owned)?
2. Where did the new fresh markets appear in the last 10 years and do you know of the reason to establish a new fresh market specifically in that spot? (thinking of accessibility/few fresh markets around etc)?
3. Which private companies and NGOs are you collaborating with to reduce food loss and food waste management?
4. Are there any farmers market in your city corporation to shorten the supply-chain, if yes, how many?
5. What short-term and long-term vision have you established as per the city charter of your respective city corporation?
6. As per the vision developed by FAO of digital wet markets what actions have you taken so far?
7. The government is providing a 10 percent tax rebate to city residents for rooftop gardening. According to the Ministry of Agriculture's Agriculture Information Service Dhaka has around 450 000 roofs covering an extensive 4500 hectares of space. What is the current state of rooftop gardening promotion in your city corporation?
8. What is the current infrastructure of water harvesting in your city corporation, considering urban dwellers require access to safe water for urban agriculture and cooking?
9. What is the current state of multi-stakeholder collaboration via your City Working Group? What challenges and barriers do you face?
10. What are the major challenges in spatial planning of food supply-chain in developing countries?
11. What are the lessons learned from the disruption of the supply chain? Post covid; e.g. food shortages, inflation etc?
12. How can food processing be integrated in the supply-chain management with the context of DMA?
13. What role should logistics and transport play in reducing food loss and waste?
14. How do you deal with climate change in the supply-chain? E.g. droughts, floods, loss in biodiversity etc.
15. Are there examples of successful integration of societal and cultural challenges/barriers in the supply chain management?
16. Can you please explain a bit more about your job role and the Ministry of Food?
17. According to our research, the Food Monitoring and Evaluation Unit is preparing GIS land-use maps for the whole country. Who is the implement organization? What is the roadmap? What are the missions and objectives?

18. The Local Government Engineering Department has a pdf version of digital maps available for Bangladesh, do you (still) use them, and if yes for what purpose? Are they helpful to better understand food system thinking in urban planning?
19. For DMA, RajUK prepares the master plan, however there is no recognition of food systems in it. Does the Food Monitoring and Evaluation Unit have food system/spatial maps of DMA?
20. According to the latest CIP report there are huge investment gaps for sustainable food production, food processing and food distribution. How can spatial planning of food systems assist the government in better policy implementation according to you?
21. Different ministries struggle to communicate, which is a big challenge for the food systems governance research. What is your experience with urban governance and spatial planning research?
22. What ideas based on your research experience can Bangladesh implement to let the (food) planning development of Bangladesh flourish?
23. What are the roles of the Ministry of Planning and Ministry of Land in the Food Monitoring and Evaluation Unit? According to the website, there is limited fiscal freedom in the annual budget used for land management, it seems to be not a top government priority. Your input on this?
24. Can you please explain a bit more about your job role and the Ministry of Planning?
25. What is your experience with urban governance and spatial planning?
26. What ideas from your global study on delta urban planning can Bangladesh implement to let the planning development of Bangladesh flourish?
27. How do planners deal with and attempt to overcome competition between different land-use claims?
28. Which decision-making approaches (e.g., government command and control, collaborative planning, stakeholder consultation) are applied in the resolution of competing for land use claims?
29. According to the website of the Ministry of Planning, there are huge communication gaps between the Ministry of Land and the registration of land by the Ministry of Law – coordination for land management. Considering your unique role in spatial planning, what major challenges have you faced?
30. Is the Ministry of land collaborating with the Food Monitoring and Evaluation Unit for the spatial planning of the Bangladesh food system? What is the current state of the art?
31. According to our resources, food system thinking is a new concept for city planners and it is also not explicitly visible in the masterplan by RajUK. What observations have you made on the urban governance and spatial planning by RajUK?
32. Can you tell us a bit more about the current state of the digital wet-markets pilot?
33. Is there a role for GIS in the setting up of the digital wet markets? If so, what is that role?
34. Do you determine with your implementation partner the fresh markets that would be selected for scaling-up (assuming the pilot is a success) or is that up to the implementation partner?
35. Would you see a role for spatial planning in determining which fresh markets have the highest priority to be digitalized? For instance, because of their easy accessibility or their big

service area? If not, how would the order of scaling-up of the digitalization of other fresh markets be determined?

36. Are there any digital market linkages between food supply-chain actors to enhance food trade and reduce food loss and waste?
37. Do you use GIS maps for urban planning?
38. Local Government Engineering Department has master plans uploaded (both in English and Bangla) on their website for different districts in Bangladesh but not for DMA. Do you have any information regarding why there are no master plans by Local Government Engineering Department for different districts in DMA?
39. Only 4-5% of Dhaka's land is used under cultivation and is in constant pressure to be used for non-agricultural purposes. What are the current initiatives to promote urban agriculture in your city corporation?
40. Food distribution channels and fresh markets remain overlooked by government officials. What initiatives is your city corporation undertaking to recognize such markets playing a critical role in access to food by urban dwellers (especially slum dwellers)?
41. Dhaka produces approximately 5,000 Tonnes of food waste daily. 80% of the waste is the solid waste from fruits and vegetables. How does your city corporation collect their waste? Secondary transfer stations are being build in DNCC, who decides where they are located?
